# Supplementary material for: Morphogene adsorption as a Turing instability regulator: Theoretical analysis and possible applications in multicellular embryonic systems
Source: PubMed Central journal article supplement (PMC5295678; doi:10.1371/journal.pone.0171212), 2017-02-07
Supplement: pone.0171212.s002.pdf [file pone.0171212.s002.pdf]

**Full paper:** Nesterenko A.M., Kuznetsov M.B., Korotkova D.D., Zaraisky A.G. Morphogene Adsorption on the Extracellular Matrix as a Possible Turing Instability Regulator in Multicellular Embryonic Systems. *PLoS ONE* (2017): 10.1371/journal.pone.0171212

## Appendix S2. Flux sweeping algorithm

The description of flux sweeping is reproduced from the book [1] written in Russian with adaptation to our case. Let us rewrite diffusion equation

$$\frac{\partial u}{\partial t} = D \frac{\partial^2 u}{\partial x^2}$$

into the flux form:

$$\frac{\partial u}{\partial t} = \frac{\partial j}{\partial x} \quad D \frac{\partial u}{\partial x} = j$$

Let us consider the system on the linear grid of  $M$  points, where  $x_m = mh$ ,  $h = L/M$ . Discrete equations at the grid nodes are the following:

$$\begin{aligned} \frac{u_m^{n+1} - u_m^n}{\tau} &= \frac{j_{m+1/2} - j_{m-1/2}}{h}, \quad m = 1, 2, \dots, M-1, \\ D \frac{u_{m+1}^{n+1} - u_m^{n+1}}{h} &= j_{m+1/2}, \quad m = 0, 1, 2, \dots, M-1. \end{aligned} \quad (\text{S2.1})$$

Let us write sweeping relation in the following form:

$$u_m^{n+1} = P_m j_{m+1/2} + R_m, \quad m = 0, 1, 2, \dots, M-1,$$

where  $P_m$  and  $R_m$  — supplementary (“sweeping”) coefficients that should be determined. First pair of these coefficients can be determined from left edge condition  $\partial u(0, t)/\partial x = 0$  (we consider Neuman condition):

$$P_0 = 2\tau/h, \quad R_0 = u_0^n. \quad (\text{S2.2})$$

Next supplementary coefficients  $P_m, R_m$  can be determined recurrently at the first stage (forward sweeping):

$$\begin{aligned} A &= 1 + \frac{h}{\tau} \left( P_m + \frac{h}{D} \right), \\ P_{m+1} &= \frac{1}{A} \left( P_m + \frac{h}{D} \right), \\ R_{m+1} &= \frac{1}{A} \left[ \left( P_m + \frac{h}{D} \right) \frac{h}{\tau} u_{m+1}^n + R_m \right]. \end{aligned} \quad (\text{S2.3})$$

At the second stage (backward sweeping) we starts with calculating  $u_M^{n+1}$  from right edge condition  $\partial u(L, t)/\partial x = 0$ :

$$\begin{aligned} u_M^{n+1} &= \frac{2\tau D R_{M-1} + (h + P_{M-1} D) h u_M^n}{h^2 + h P_{M-1} D + 2\tau D}, \\ j_{M-1} &= \frac{h}{2\tau} (u_M^n - u_M^{n+1}). \end{aligned} \quad (\text{S2.4})$$

Next, values of variable  $u$  and its flux  $j$  in the left grid points are calculated sequentially:

$$\begin{aligned}j_{m-1/2} &= j_{m+1/2} - \frac{h}{\tau} u_m^{n+1} + \frac{h}{\tau} u_m^n, \\u_{m-1}^{n+1} &= P_{m-1} j_{m-1/2} + R_{m-1}.\end{aligned}\tag{S2.5}$$

Equations (S2.3),(S2.5) are called flux sweeping equations, whereas Eq (S2.2) and Eq (S2.4) can be modified according to edge conditions.

## References

1. Fedorenko RP. Introduction to Computational Physics. Moscow, Russia: MPTI; 1994.
